# Supplementary material for: Multidimensional Biomechanics-Based Score to Assess Disease Progression in Duchenne Muscular Dystrophy
Source: MDPI journal article supplement (doi:10.3390/s23020831), 2023-01-11
Supplement: s1 [file s1]

## ANNEX I Clinically relevant parameters

From the before mentioned bibliographic analysis, the previous experience of the biomechanics group, the clinician assessment and the capabilities of the devices used, a set of clinical relevant parameters was defined. All the parameters are classified in five classes depending on the type of variable that represent: spatial-temporal, cardiorespiratory, kinematic, electromyography and plantar pressure. In the following tables (Table S1 – Table S5) all the parameters calculated are listed and defined briefly.

| Spatial-temporal parameters |                                                                                                            |
|-----------------------------|------------------------------------------------------------------------------------------------------------|
| Parameters                  | Definition                                                                                                 |
| Distance (m)                | Distance covered by the patient during the test                                                            |
| Number of steps             | Steps walked during the test                                                                               |
| Speed (m/s)                 | Velocity of the patient gait                                                                               |
| Cadence (steps/min)         | Number of steps per minutes                                                                                |
| Stride length (m)           | Length in meters of a gait cycle                                                                           |
| Stride velocity (m/s)       | Velocity in meters / second of a gait cycle                                                                |
| Stance phase (%)            | Percentage of time in stance phase, foot- ground contact, on the overall gait cycle.                       |
| Swing phase (%)             | Percentage of time in swing phase, foot in the air, on the overall gait cycle.                             |
| Single Support (%)          | Percentage of time in single support, one foot on the ground, on the overall gait cycle.                   |
| Double Support (%)          | Percentage of time in double support, both feet on the ground, on the overall gait cycle.                  |
| Load Response (%)           | Percentage of time that takes the load response, absorption of the foot impact, on the overall gait cycle. |
| Pre – swing (%)             | Percentage of time that takes the pre-swing, foot pushed off the ground, on the overall gait cycle.        |

Table S1: Description of spatial-temporal parameters

| Cardiorespiratory parameters  |                                                                                  |
|-------------------------------|----------------------------------------------------------------------------------|
| Parameters                    | Definition                                                                       |
| Heart Rate (bpm)              | Evolution of the heart rate value throughout the test                            |
| Heart Rate range              | Difference between the maximum and the minimum HR                                |
| R – R intervals               | Time intervals between consecutive heart beats                                   |
| Heart Rate Variability (SDNN) | Variability of RR intervals calculated as the standard deviation of RR intervals |

Table S2: Description of heart rate parameters

| Kinematic parameters |                                           |
|----------------------|-------------------------------------------|
| Parameters           | Definition                                |
| Hip flexion          | Flexion-extension at initial contact (IC) |

|               |                                             |
|---------------|---------------------------------------------|
|               | Flexion-extension at take-off (TO)          |
|               | Maximum flexion-extension at swing (Sw)     |
|               | Minimum flexion-extension                   |
|               | Flexion – extension range                   |
| Hip adduction | Maximum abduction – adduction               |
|               | Minimum abduction – adduction               |
|               | Abduction – adduction range                 |
| Knee flexion  | Flexion – extension at initial contact (IC) |
|               | Flexion – extension maximum at stance (St)  |
|               | Flexion – extension minimum at stance (St)  |
|               | Flexion – extension maximum at swing (Sw)   |
|               | Flexion – extension range                   |
| Ankle flexion | Flexion – extension at initial contact (IC) |
|               | Flexion – extension maximum at stance (St)  |
|               | Flexion – extension maximum at swing (Sw)   |
|               | Flexion – extension minimum at swing (Sw)   |
|               | Flexion – extension range                   |

Table S3: Description of kinematic parameters

| Electromyography (EMG) parameters   |                                                                                                                               |
|-------------------------------------|-------------------------------------------------------------------------------------------------------------------------------|
| Parameters                          | Definition                                                                                                                    |
| Maximum voluntary contraction (MVC) | Maximum muscle activation while doing isometric exercises, is related with muscle strength                                    |
| Muscle Load                         | 1 second EMG mean of each channel. Total muscle load is the sum of the muscle loads of each muscle.                           |
| Muscle Distribution                 | % of activation of each muscle in respect to the total activation                                                             |
| Muscle Balance                      | % of activation of the left side in comparison to the right side or % of activation of hamstrings in comparison to quadriceps |
| Co-activation indices               | Timing of simultaneous activation of two muscles. Relation between (H/Q, H/G, Q/G).                                           |
| EMG profiles                        | Characterized by identifying maximum, minimum, range and values from specific points of the cycle                             |

Table S4: Description of electromyography parameters

| Plantar Pressure parameters |                                                                                |
|-----------------------------|--------------------------------------------------------------------------------|
| Parameters                  | Definition                                                                     |
| Force Balance (%)           | Comparison of the percentage of the total force on right side versus left side |
| Heel / Toe IC               | Detection if initial contact with the ground is with heel or toe               |
| Heel / Toe TO               | Detection if take-off the ground is with heel or toe                           |
| Centre of Pressure          | Trajectory of centre of pressure during gait cycle                             |

Table S5: Description of plantar pressure parameters
